# Supplementary material
Source: PubMed Central journal article supplement (PMC3657782)
Supplement: 1216438110_pnas.201216438SI.pdf [file 1216438110_pnas.201216438SI.pdf]

# Supporting Information

Gibson et al. 10.1073/pnas.1216438110

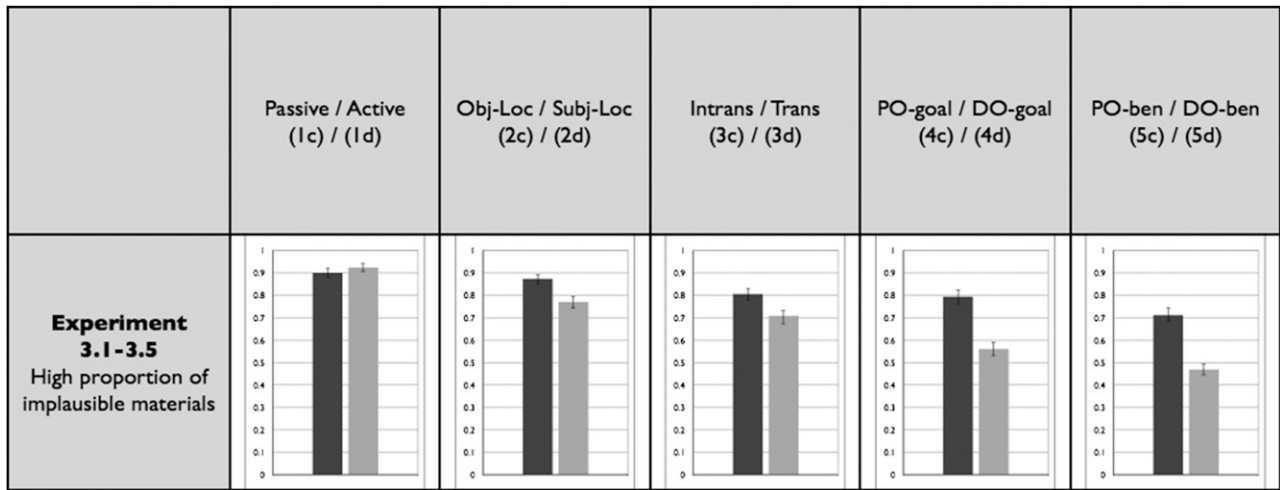

**Fig. S1.** Replication of experiment 3 using local in-laboratory participants. A comparison with the data gathered from Amazon's Mechanical Turk (Fig. 2, *Bottom*) reveals the same patterns of results. In order to ensure that the results were not affected by the online administration of the experiments (via [Amazon.com](http://Amazon.com)'s Mechanical Turk interface), we reran experiment 3 in the laboratory. The results (shown in Fig. S1) were very similar to those obtained via Mechanical Turk. In particular, the first two predictions of the model were again borne out (the third and fourth predictions could not be evaluated using experiment 3 alone). First, the rate of literal interpretation was higher for the major change alternations than for the minor change alternations (86.6% vs. 67.4%;  $\beta = 1.67$ ;  $P < 0.001$ ). Second, the rate of literal interpretation was higher for the insertions than for the deletions (76.9% vs. 57.9%;  $\beta = 1.27$ ;  $P < 0.001$ ).
